# Supplementary material
Source: publisher site journal article supplement (https://www.degruyter.com/publication/journal_key/OPAR/downloadAsset/OPAR_CFP_Digital_Religioscapes.pdf)
Supplement: Supplementary file 1 [file OPAR_CFP_Digital_Religioscapes.pdf]



# Digital Religioscapes: Current Methodologies and Novelties in the Analysis of Sacr(aliz)ed Spaces

## COORDINATING EDITORS

---

Anaïs Lamesa, Institut Français d'Études Anatoliennes, Turkey  
Asuman Lätzer-Lasar, University of Marburg, Germany

## DESCRIPTION

---

*Open Archaeology* invites manuscripts for the Special Issue “Digital Religioscapes: Current Methodologies and Novelties in the Analysis of Sacr(aliz)ed Spaces”.

The study of ancient religions—their materiality and practices—was subject to enormous changes, especially since different approaches from other disciplines, such as sociology, cultural studies, or anthropology, were made fruitful for the archaeology of ancient religions and subsequently enabled a qualitative approach to the research questions. This led to an understanding of religious spaces on the one hand as an outcome of social interaction, and on the other hand as a shared space with its own locally produced identity. However, the digital humanities have yet to find a meaningful way to integrate the resulting qualitative data into existing digital infrastructures and correlate it with quantitative data.

The purpose of this special issue is to highlight the variety of methods when gathering, modelling/visualising, presenting, and analysing digital data and to discuss the diverse ways in which these heterogeneous methods and tools can be usefully combined. Approaches that use mixed data (qualitative and quantitative), such as Story Maps or Deep Map(ping) are discussed, as well as the advantages and disadvantages of various individual tools and applications, such as network models, cartograms, modelling of movement patterns, agent-based modelling, temporalities or sensoriscapes (soundscapes, smellscapes, viewsheds), to name a few.

Since we are concentrating on the methodological approaches and applications for investigating religious spaces, the special issue is opened to case studies from a variety of chronological periods and geographical regions, reaching from the circum-Mediterranean to central Asia, and at least from the Iron Age until the Early Modern Period.

## HOW TO SUBMIT

---

The authors are kindly invited to submit their contribution via the online submission system Editorial Manager available at:

<http://www.editorialmanager.com/opar/Default.aspx>

Please select the Category “SI on Digital Religioscapes” to ensure that the manuscript is processed by the Guest Editors.



# Digital Religioscapes: Current Methodologies and Novelties in the Analysis of Sacr(aliz)ed Spaces

It is important that authors include a cover letter with their manuscript. The cover letter should explicitly state that the manuscript (or one with substantially the same content, by any of the authors) has not been previously published in any language anywhere and that it is not under simultaneous consideration or in press by another journal.

Before submission, the authors should carefully read over the Instructions for Authors, which are located at:

[www.degruyter.com/publication/journal\\_key/OPAR/downloadAsset/OPAR\\_Instructions%20for%20Authors.pdf](http://www.degruyter.com/publication/journal_key/OPAR/downloadAsset/OPAR_Instructions%20for%20Authors.pdf)

There are no specific length restrictions for the overall manuscript or individual sections; however, we urge the authors to present and discuss their findings in a concise and accessible manner. We recommend a length of 8,000–12,000 words, excluding the bibliography and figure captions.

Submission of a manuscript does not necessarily imply approval for its publication in this *Open Archaeology* special issue. The manuscript will be subjected to a peer review procedure managed by our esteemed Guest Editors and its acceptance will depend on this assessment.

*Open Archaeology* applies Article Publishing Charges (APC), to cover costs of publication in open access. There is no submission fee.

We are looking forward to your submission until 15 February 2024.

If you have any questions, please contact: Anaïs Lamesa ([anaislamesa@yahoo.fr](mailto:anaislamesa@yahoo.fr)) or Katarzyna Inga Michalak ([katarzyna.michalak@degruyter.com](mailto:katarzyna.michalak@degruyter.com)).
